# Supplementary material for: Organic–inorganic hybrid metallic conductors based on bis(ethylenedithio)tetrathiafulvalene cations and antiferromagnetic oxalate-bridged copper(ii) dinuclear anions
Source: Royal Society of Chemistry journal article supplement (doi:10.1039/d1tc04305f), 2022-01-01
Supplement: d1tc04305f1.pdf [file d1tc04305f1.pdf]

Supporting Information for

**Organic–Inorganic Hybrid Metallic Conductor Based on  
Bis(ethylenedithio)tetrathiafulvalene Cation and  
Antiferromagnetically Oxalate-Bridged Copper(II) Dinuclear Anion**

Bin Zhang,<sup>\*,a</sup> Yan Zhang,<sup>b</sup> Zheming Wang,<sup>\*,c</sup> Dongwei Wang,<sup>d</sup> Deliang Yang,<sup>e</sup> Zengqiang Gao,<sup>f</sup>  
Guangcai Chang,<sup>f</sup> Yanjun Guo,<sup>d</sup> Takehiko Mori,<sup>\*,g</sup> Zhijuan Zhao,<sup>e</sup> Fen Liu,<sup>e</sup> Qiaolian Li,<sup>e</sup> and Daoben  
Zhu<sup>\*,a</sup>

<sup>a</sup>Organic Solid Laboratory, BNLMS, CMS & Institute of Chemistry, Chinese Academy of Science, Beijing, 100190, People's Republic of China. <sup>b</sup>Institute of Condensed Matter and Material Physics, Department of Physics, Peking University, Beijing, 100871, People's Republic of China. <sup>c</sup>State Key Laboratory of Rare Earth Materials Chemistry and Applications, BNLMS, College of Chemistry and Molecular Engineering, Peking University, Beijing, 100871, People's Republic of China. <sup>d</sup>CAS Key Laboratory of Standardization and Measurement for Nanotechnology, National Center for Nanoscience and Technology, Beijing, 100190, People's Republic of China. <sup>e</sup>CAS Research/Education Center for Excellence in Molecular Science, CMS & BNLMS, Institute of Chemistry, Chinese Academy of Sciences, Beijing, 100190, People's Republic of China. <sup>f</sup>BSRF, Institute of High Energy Physics, Chinese Academy of Sciences, Beijing, 100047, People's Republic of China. <sup>g</sup>Department of Materials Science and Engineering, Tokyo Institute of Technology, O-Okayama, Tokyo 152-8552, Japan.

\* To whom correspondence should be addressed. E-mail: [zhangbin@iccas.ac.cn](mailto:zhangbin@iccas.ac.cn),  
[zmw@pku.edu.cn](mailto:zmw@pku.edu.cn), [mori\\_t\\_ae@m.titech.ac.jp](mailto:mori_t_ae@m.titech.ac.jp), [zhudb@iccas.ac.cn](mailto:zhudb@iccas.ac.cn)

## Contents

|                                                                                                                                                                                                                                                                                                                                                                                                                                                                                                                                                                                                                                                                                                                                                                                                                                                                                                                                                                                                                                                                                                                   |       |
|-------------------------------------------------------------------------------------------------------------------------------------------------------------------------------------------------------------------------------------------------------------------------------------------------------------------------------------------------------------------------------------------------------------------------------------------------------------------------------------------------------------------------------------------------------------------------------------------------------------------------------------------------------------------------------------------------------------------------------------------------------------------------------------------------------------------------------------------------------------------------------------------------------------------------------------------------------------------------------------------------------------------------------------------------------------------------------------------------------------------|-------|
| <b>Table S1.</b> Crystallographic data of $\beta''$ -(BEDT-TTF) <sub>3</sub> [Cu <sub>2</sub> ( $\mu$ -C <sub>2</sub> O <sub>4</sub> )(C <sub>2</sub> O <sub>4</sub> ) <sub>2</sub> (CH <sub>3</sub> OH)-(H <sub>2</sub> O)]                                                                                                                                                                                                                                                                                                                                                                                                                                                                                                                                                                                                                                                                                                                                                                                                                                                                                      | S3-S4 |
| <b>Table S2.</b> Formal charges of the BEDT-TTF molecules assigned from bond length of the TTF core at 180 and 290 K                                                                                                                                                                                                                                                                                                                                                                                                                                                                                                                                                                                                                                                                                                                                                                                                                                                                                                                                                                                              | S5    |
| <b>Table S3.</b> Cu–O bond lengths (Å) in dinuclear anion at different temperatures.                                                                                                                                                                                                                                                                                                                                                                                                                                                                                                                                                                                                                                                                                                                                                                                                                                                                                                                                                                                                                              | S6    |
| <b>Figure S1.</b> Morphologies of the crystals Viewed with reflectance mode (top) and transmission mode (bottom).                                                                                                                                                                                                                                                                                                                                                                                                                                                                                                                                                                                                                                                                                                                                                                                                                                                                                                                                                                                                 | S7    |
| <b>Figure S2.</b> (a) Crystal structure of $\theta^{21}$ -(BEDT-TTF) <sub>3</sub> [Cu <sub>2</sub> ( $\mu$ -C <sub>2</sub> O <sub>4</sub> ) <sub>3</sub> ] 2CH <sub>3</sub> OH without solvent molecules, viewed along the <i>a</i> axis; (b) Donor arrangement of $\theta^{21}$ -(BEDT-TTF) <sub>3</sub> [Cu <sub>2</sub> ( $\mu$ -C <sub>2</sub> O <sub>4</sub> ) <sub>3</sub> ] 2CH <sub>3</sub> OH viewed along the <i>c</i> axis; (c) Donor arrangement of $\theta^{21}$ -(BETS) <sub>3</sub> [Cu <sub>2</sub> ( $\mu$ -C <sub>2</sub> O <sub>4</sub> ) <sub>3</sub> ] 2CH <sub>3</sub> OH viewed along the <i>c</i> axis. Color code: Cu, cyan; O, red; S, yellow; Se, teal; C, grey; H, dark grey; hydrogen bonds, blue dash lines; S $\cdots$ S, S $\cdots$ Se, and Se $\cdots$ Se contacts, blue solid lines. $\theta^{21}$ -(BEDT-TTF) <sub>3</sub> [Cu <sub>2</sub> ( $\mu$ -C <sub>2</sub> O <sub>4</sub> ) <sub>3</sub> ] 2CH <sub>3</sub> OH and $\theta^{21}$ -(BETS) <sub>3</sub> [Cu <sub>2</sub> ( $\mu$ -C <sub>2</sub> O <sub>4</sub> ) <sub>3</sub> ] 2CH <sub>3</sub> OH are isostructural. | S8    |
| <b>Figure S3.</b> ZFCM/FCM/RM of polycrystal under 100 Oe.                                                                                                                                                                                                                                                                                                                                                                                                                                                                                                                                                                                                                                                                                                                                                                                                                                                                                                                                                                                                                                                        | S9    |
| <b>Figure S4.</b> Specific heat measurement from 120 to 2 K under 0 T (black square) and 5 T (red circle).                                                                                                                                                                                                                                                                                                                                                                                                                                                                                                                                                                                                                                                                                                                                                                                                                                                                                                                                                                                                        | S10   |

**Table S1** Crystallographic data of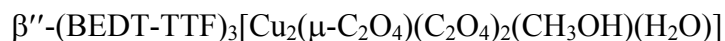

|                                                                                          |                                                                                 |                                                                                 |                                                                                 |
|------------------------------------------------------------------------------------------|---------------------------------------------------------------------------------|---------------------------------------------------------------------------------|---------------------------------------------------------------------------------|
| <i>T</i> , K                                                                             | 100                                                                             | 180                                                                             | 290                                                                             |
| Formula                                                                                  | C <sub>37</sub> H <sub>30</sub> Cu <sub>2</sub> O <sub>14</sub> S <sub>24</sub> | C <sub>37</sub> H <sub>30</sub> Cu <sub>2</sub> O <sub>14</sub> S <sub>24</sub> | C <sub>37</sub> H <sub>30</sub> Cu <sub>2</sub> O <sub>14</sub> S <sub>24</sub> |
| Fw.                                                                                      | 1595.13                                                                         | 1595.13                                                                         | 1595.13                                                                         |
| F(000)                                                                                   | 806                                                                             | 806                                                                             | 806                                                                             |
| crystal system                                                                           | triclinic                                                                       | triclinic                                                                       | triclinic                                                                       |
| space group                                                                              | <i>P</i> $\bar{1}$                                                              | <i>P</i> $\bar{1}$                                                              | <i>P</i> $\bar{1}$                                                              |
| <i>a</i> , Å                                                                             | 7.4803(3)                                                                       | 7.5040(3)                                                                       | 7.5382(2)                                                                       |
| <i>b</i> , Å                                                                             | 9.3547(3)                                                                       | 9.3956(4)                                                                       | 9.4785(2)                                                                       |
| <i>c</i> , Å                                                                             | 18.6711(7)                                                                      | 18.6999(7)                                                                      | 18.7231(4)                                                                      |
| $\alpha$ , °                                                                             | 95.797(3)                                                                       | 95.930(3)                                                                       | 96.049(2)                                                                       |
| $\beta$ , °                                                                              | 90.974(3)                                                                       | 90.861(3)                                                                       | 90.732(2)                                                                       |
| $\gamma$ , °                                                                             | 93.508(3)                                                                       | 93.745(4)                                                                       | 94.417(2)                                                                       |
| <i>V</i> , Å <sup>3</sup>                                                                | 1297.06(8)                                                                      | 1308.26(9)                                                                      | 1326.09(5)                                                                      |
| <i>Z</i>                                                                                 | 1                                                                               | 1                                                                               | 1                                                                               |
| <i>D<sub>c</sub></i> , g/cm <sup>3</sup>                                                 | 2.042                                                                           | 2.025                                                                           | 1.997                                                                           |
| $\mu$ (Mo K $\alpha$ ), mm <sup>-1</sup>                                                 | 1.852                                                                           | 1.837                                                                           | 1.812                                                                           |
| <i>T</i> <sub>min</sub> and <i>T</i> <sub>max</sub>                                      | 0.874, 1.000                                                                    | 0.866, 1.000                                                                    | 0.880, 1.000                                                                    |
| $\theta_{\text{min}}$ , $\theta_{\text{max}}$ / °                                        | 3.515, 27.868                                                                   | 3.531, 27.876                                                                   | 3.565, 27.877                                                                   |
| No. total reflns.                                                                        | 28850                                                                           | 29907                                                                           | 29326                                                                           |
| No. uniq. reflns.                                                                        | 6139                                                                            | 6184                                                                            | 6285                                                                            |
| No. obs.[ <i>I</i> ≥ 2( <i>I</i> <sub>0</sub> )]                                         | 5239                                                                            | 5095                                                                            | 4820                                                                            |
| No. params                                                                               | 359                                                                             | 359                                                                             | 359                                                                             |
| Restraints                                                                               | 5                                                                               | 5                                                                               | 5                                                                               |
| Complete, %                                                                              | 99.4                                                                            | 99.4                                                                            | 99.3                                                                            |
| <i>R</i> <sub>s</sub> / <i>R</i> <sub>int</sub>                                          | 0.0255/0.0281                                                                   | 0.0289/0.0311                                                                   | 0.0359/0.0381                                                                   |
| <i>R</i> <sub>1</sub> , <i>wR</i> <sub>2</sub> [ <i>I</i> ≥ 2σ( <i>I</i> <sub>0</sub> )] | 0.0539, 0.1595                                                                  | 0.0497, 0.1401                                                                  | 0.0488, 0.1277                                                                  |
| <i>R</i> <sub>1</sub> , <i>wR</i> <sub>2</sub> (all data)                                | 0.0630, 0.1652                                                                  | 0.0615, 0.1471                                                                  | 0.0674, 0.1386                                                                  |
| GOF                                                                                      | 1.144                                                                           | 1.098                                                                           | 1.080                                                                           |
| <sup>a</sup> Δρ, e/Å <sup>3</sup>                                                        | 1.753, -1.537                                                                   | 1.534, -1.105                                                                   | 1.453, -0.685                                                                   |
| <sup>b</sup> Max. and mean Δ/σ                                                           | 0.001, 0.000                                                                    | 0.000, 0.000                                                                    | 0.001, 0.000                                                                    |
| CCDC                                                                                     | 2019618                                                                         | 2019619                                                                         | 2019620                                                                         |

\* The distance between O and C of methanol was restrained. The residue peaks higher than 1.0 e/Å<sup>3</sup> were near the Cu atom or S atoms.

- \* The distance between O and C of methanol was restrained.
- \* Due to the existence of the disordered CH<sub>3</sub> group of methanol, the anisotropic thermal factor of C19 is large and suggests to be splitted. We tried to split it into two positions, but the refinement result suggested the position to be splitted once more. So the ADP max/min ratio of C19 is 7.4, and the Ueq(max)/Ueq(min) range of it is 10.0.
- \* The O7 shared by H<sub>2</sub>O and CH<sub>3</sub>OH is bonded to Cu with Cu-bond, so its thermal factor is lower than the disordered C19 connected with it.
- \* When all of reflections are used for least-squares refinement, there are residue peaks from difference Fourier near Cu, S atoms within 1 Å and the least-squares refinement is not convergent. After some disagreeable reflections with Error/esd higher than 6.4 were omitted, the least-squares refinement converges and the highest peak is reduced. The residue peaks higher than 1.0 e/Å<sup>3</sup> were near the Cu atom or S atoms.

**Table S2** Formal charges of the BEDT-TTF molecules assigned from bond length of the TTF core at 290 and 180 K of

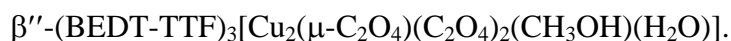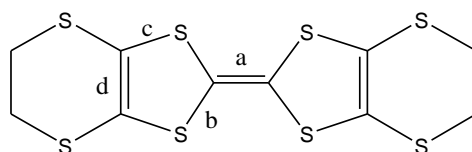

$$\delta = (b+c)-(a+d), Q = 6.347 - 7.463\delta$$

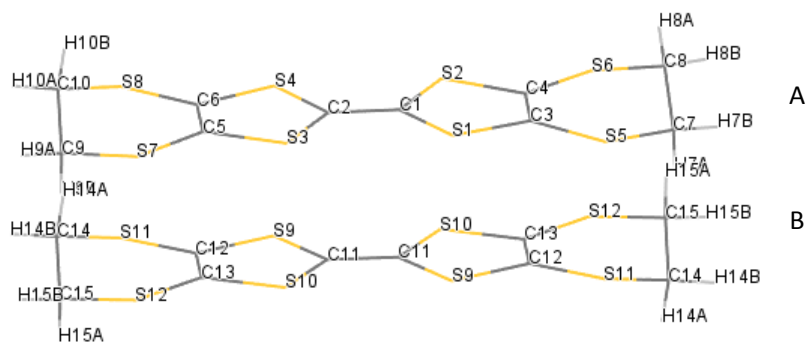

290 K

|       | a        | b                                                      | c                                                      | d                              | $\delta$ | Q     |
|-------|----------|--------------------------------------------------------|--------------------------------------------------------|--------------------------------|----------|-------|
| A     | 1.375(5) | 1.730(3)<br>1.730(2)<br>1.726(3)<br>1.731(3)<br>~1.729 | 1.745(3)<br>1.746(3)<br>1.739(3)<br>1.743(3)<br>~1.743 | 1.359(4)<br>1.366(4)<br>~1.363 | 0.734    | 0.869 |
| B     | 1.375(6) | 1.728(3)<br>1.726(3)<br>~1.727                         | 1.743(3)<br>1.741(3)<br>~1.742                         | 1.360(4)                       | 0.734    | 0.869 |
| Total |          |                                                        |                                                        |                                |          | 2.6   |

180K

|       | a        | b                                                      | c                                                      | d                              | $\delta$ | Q     |
|-------|----------|--------------------------------------------------------|--------------------------------------------------------|--------------------------------|----------|-------|
| A     | 1.372(5) | 1.735(4)<br>1.728(4)<br>1.730(4)<br>1.733(4)<br>~1.732 | 1.749(4)<br>1.748(4)<br>1.739(4)<br>1.732(4)<br>~1.742 | 1.356(5)<br>1.354(5)<br>~1.355 | 0.747    | 0.772 |
| B     | 1.375(7) | 1.725(4)<br>1.733(4)<br>~1.729                         | 1.744(4)<br>1.750(3)<br>~1.747                         | 1.356(5)                       | 0.745    | 0.787 |
| Total |          |                                                        |                                                        |                                |          | 2.33  |

**Table S3.** Cu–O bond lengths (Å) in the binuclear anion at different temperatures.

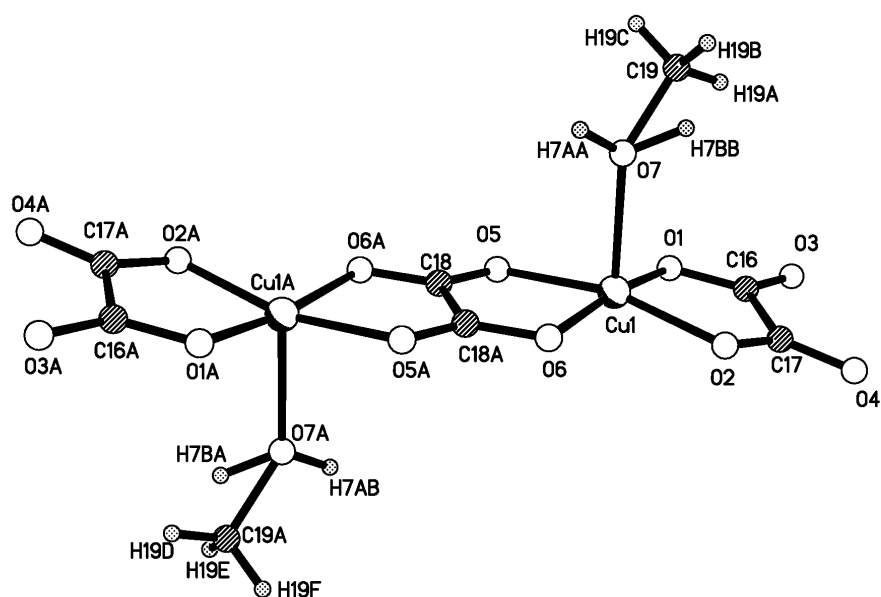

| T, K      | 100   | 180   | 290   |
|-----------|-------|-------|-------|
| Cu1-O1, Å | 1.937 | 1.937 | 1.929 |
| Cu1-O2, Å | 1.930 | 1.931 | 1.923 |
| Cu1-O5, Å | 2.000 | 2.003 | 2.001 |
| Cu1-O6, Å | 2.001 | 2.003 | 2.000 |
| Cu1-O7, Å | 2.231 | 2.240 | 2.261 |

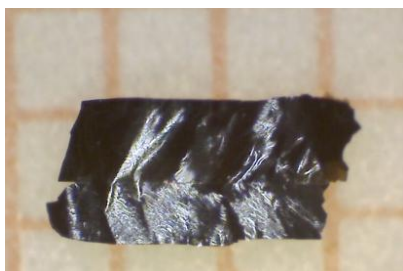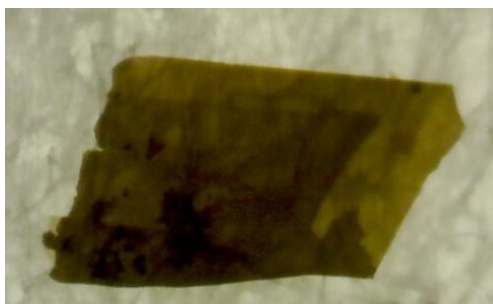

**Figure S1.** Morphologies of the crystals. Viewed with reflectance mode(top) and transmission mode (bottom).

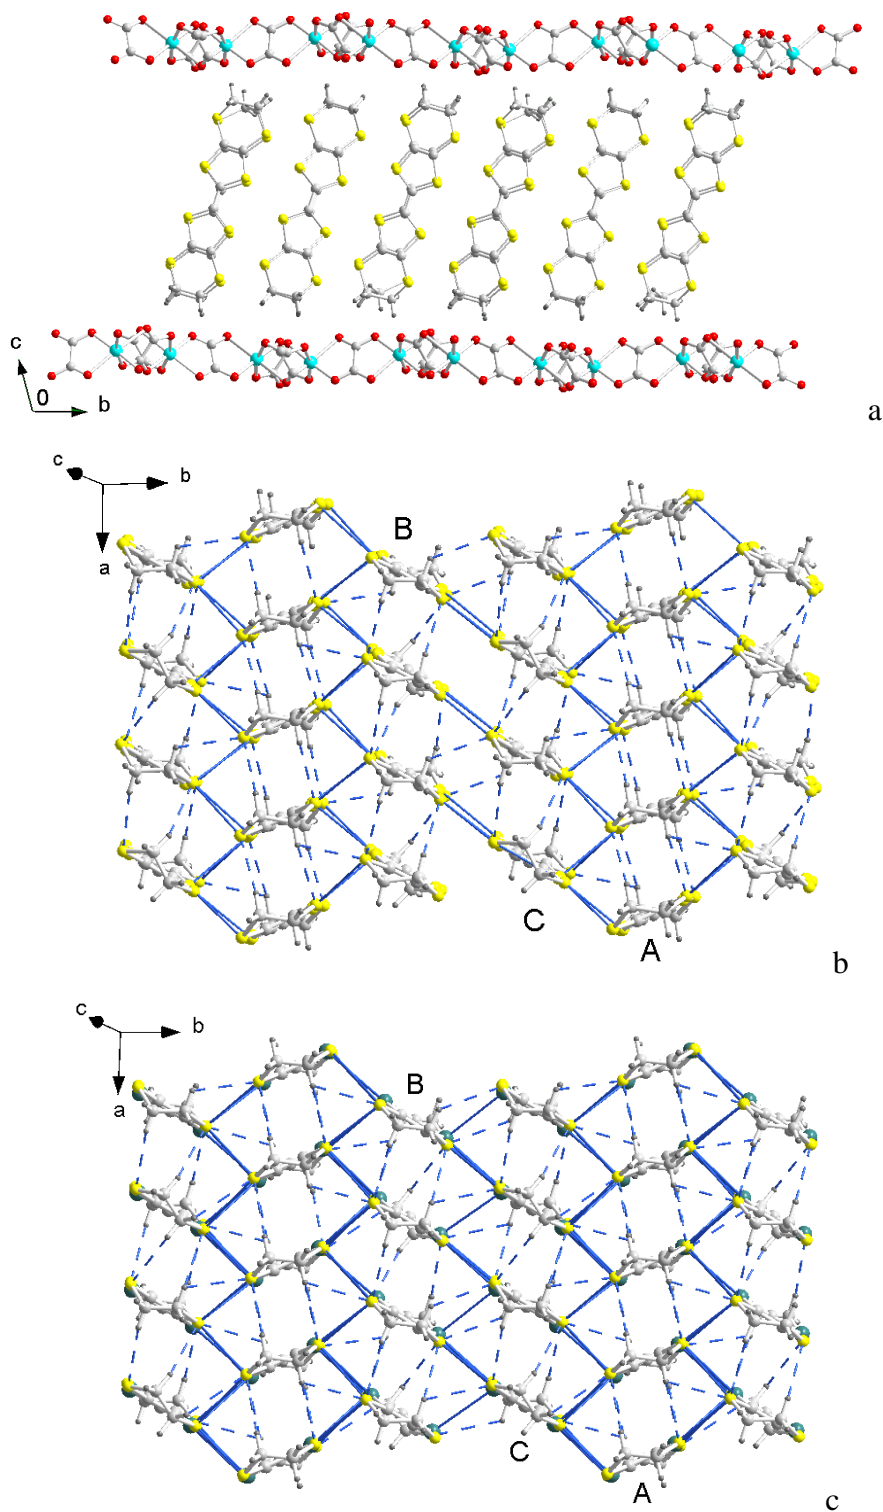

**Figure S2.** (a) Crystal structure of  $\theta^{21}$ -(BEDT-TTF)<sub>3</sub>[Cu<sub>2</sub>( $\mu$ -C<sub>2</sub>O<sub>4</sub>)<sub>3</sub>] · 2CH<sub>3</sub>OH without solvent molecules, viewed along the *a* axis; (b) Donor arrangement of  $\theta^{21}$ -(BEDT-TTF)<sub>3</sub>[Cu<sub>2</sub>( $\mu$ -C<sub>2</sub>O<sub>4</sub>)<sub>3</sub>] · 2CH<sub>3</sub>OH viewed along the *c* axis; (c) Donor arrangement of  $\theta^{21}$ -(BETS)<sub>3</sub>[Cu<sub>2</sub>( $\mu$ -C<sub>2</sub>O<sub>4</sub>)<sub>3</sub>] · 2CH<sub>3</sub>OH viewed along the *c* axis. Color code: Cu, cyan; O, red; S, yellow; Se, teal; C, grey; H, dark grey; hydrogen bonds, blue dash lines; S ··· S, S ··· Se, and Se ··· Se contacts, blue solid lines.

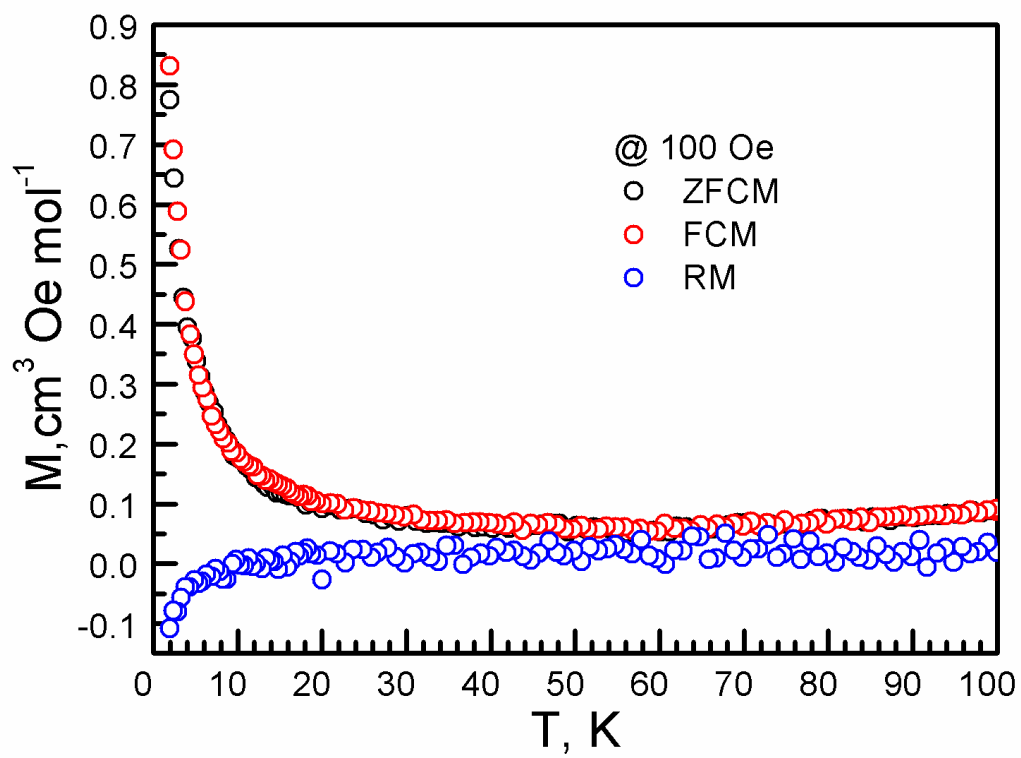

**Figure S3.** ZFCM/FCM/RM of polycrystal under 100 Oe.

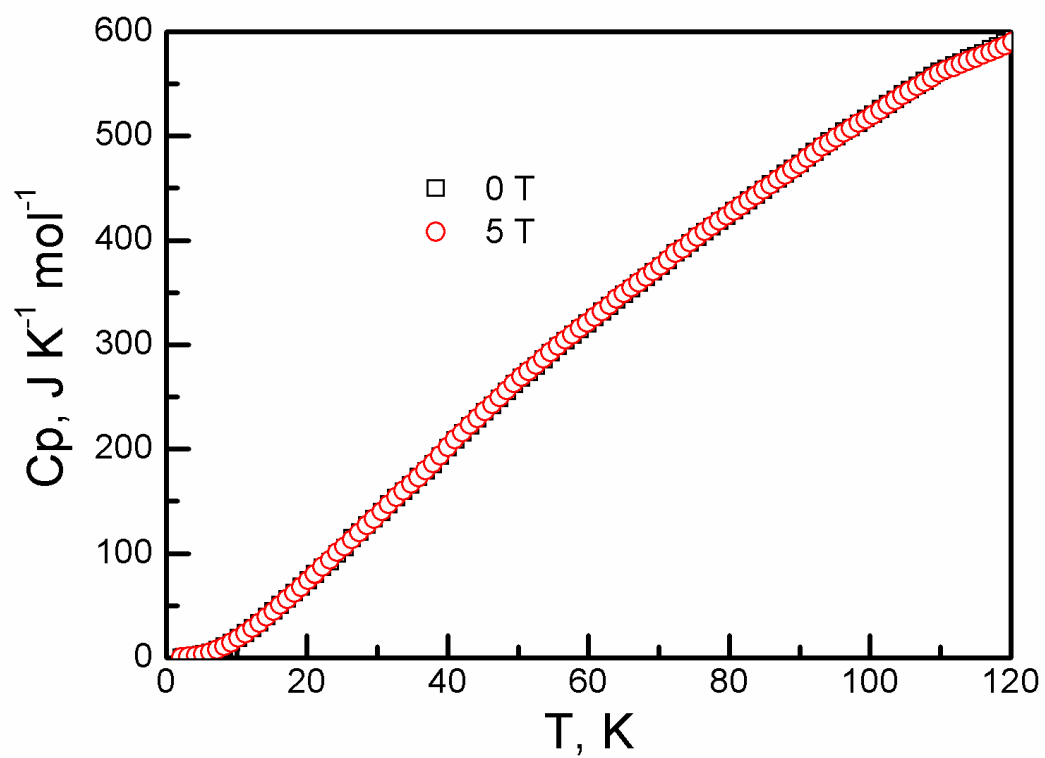

**Figure S4.** Specific heat measurement from 120 to 2 K under 0 T (black square) and 5 T (red circle).
